# Supplementary material for: Clmp Regulates AMPA and Kainate Receptor Responses in the Neonatal Hippocampal CA3 and Kainate Seizure Susceptibility in Mice
Source: Front Synaptic Neurosci. 2020 Dec 21;12:567075. doi: 10.3389/fnsyn.2020.567075 (PMC7779639; doi:10.3389/fnsyn.2020.567075)
Supplement: Supplementary Table 1 — Statistical Details. [file Table_1.XLSX]

## Sheet: Sheet1
Supplementary Table 1. Statistical Details
FIGURE NUMBER		ASSAY	Parameter	TEST USED	n		DESCRIPTIVE STATS (AVERAGE, VARIANCE)		P VALUE	DEGREES OF FREEDOM & F/t/z/R/ETC VALUE	D'Agostino & Pearson normality test		Shapiro-Wilk normality test
				WHICH TEST?	EXACT VALUE	DEFINED?	REPORTED?		EXACT VALUE	VALUE	P VALUE	Passed normality test (alpha=0.05)?	P VALUE	Passed normality test (alpha=0.05)?
3	B	(CA3) AMPAR-mEPSCs	Frequency (Hz)	two-tailed unpaired Student’s t-test	23, 26	neurons from 7, 7 mice (WT, KO)	WT = 0.2720 ± 0.02722 KO = 0.4012 ± 0.05154		0.0381, *	t=2.134 df=47	WT = 0.1740 KO = 0.1827	Yes
			Amplitude (pA)	two-tailed unpaired Student’s t-test	23, 26	neurons from 7, 7 mice (WT, KO)	WT = 27.61 ± 0.8230 KO = 30.98 ± 0.8396		0.0065, **	t=2.847 df=47	WT = 0.3796 KO = 0.7088	Yes
			Rise time (ms)	two-tailed unpaired Student’s t-test	23, 26	neurons from 7, 7 mice (WT, KO)	WT = 0.9485 ± 0.001694 KO = 0.9468 ± 0.001238		0.4272	t=0.801 df=47	WT = 0.2800 KO = 0.2008	Yes
			Decay time (ms)	two-tailed unpaired Student’s t-test	23, 26	neurons from 7, 7 mice (WT, KO)	WT = 4.702 ± 0.1187 KO = 4.634 ± 0.1237		0.5171	t=0.6525 df=50	WT =0.4739 KO = 0.7281	Yes
	C	(CA1) AMPAR-mEPSCs	Frequency (Hz)	two-tailed unpaired Student’s t-test	13, 10	neurons from 4, 4 mice (WT, KO)	WT = 0.7641 ± 0.1475 KO = 0.8733 ± 0.2668		0.9701	t=0.038 df=19	WT = 0.7646, ns KO = 0.9576, ns	Yes
			Amplitude (pA)	two-tailed unpaired Mann-Whitney test	13, 10	neurons from 4, 4 mice (WT, KO)	WT = 22.74 ± 1.176 KO = 23.04 ± 1.491		0.8666	Mann-Whitney U = 62	WT = 0.0015 KO = 0.0013	No
			Rise time (ms)	two-tailed unpaired Student’s t-test	13, 10	neurons from 4, 4 mice (WT, KO)	WT = 2.372 ± 0.1023 KO = 2.364 ± 0.1143		0.9596	t=0.05126 df=21	WT = 0.6736, ns KO = 0.8049, ns	Yes
			Decay time (ms)	two-tailed unpaired Student’s t-test	13, 10	neurons from 4, 4 mice (WT, KO)	WT = 8.489 ± 0.2215 KO = 8.51 ± 0.2782		0.9536	t=0.05887 df=21	WT = 0.5904, ns KO = 0.2348, ns	Yes
	D	(DG) AMPAR-mEPSCs	Frequency (Hz)	two-tailed unpaired Student’s t-test	23, 17	neurons from 5, 5 mice (WT, KO)	WT = 0.7607 ± 0.1260 KO = 0.5971 ± 0.1255		0.3744	t=0.8988 df=38	WT = 0.1771 KO = 0.3415	Yes
			Amplitude (pA)	two-tailed unpaired Student’s t-test	23, 17	neurons from 5, 5 mice (WT, KO)	WT = 24.55 ± 0.8396 KO = 24.85 ± 1.2080		0.8351	t=0.2096 df=38	WT = 0.2911 KO = 0.1356	Yes
			Rise time (ms)	two-tailed unpaired Student’s t-test	23, 17	neurons from 5, 5 mice (WT, KO)	WT = 1.259 ± 0.0595 KO = 1.226 ± 0.05751		0.6996	t=0.3887 df=39	WT = 0.3328 KO = 0.5922	Yes
			Decay time (ms)	two-tailed unpaired Mann-Whitney test	23, 17	neurons from 5, 5 mice (WT, KO)	WT = 5.473 ± 0.1159 KO = 5.612 ± 0.1724		0.2674	Mann-Whitney U = 164	WT = 0.4879 KO = 0.0326	No
	E	(CA3) GABAAR-mIPSCs	Frequency (Hz)	two-tailed unpaired Mann-Whitney test	20, 15	neurons from 4, 4 mice (WT, KO)	WT = 0.4896 ± 0.1033 KO = 0.4528 ± 0.09374		0.9924	Mann-Whitney U = 142	WT = 0.0114 KO = 0.1604	No
			Amplitude (pA)	two-tailed unpaired Student’s t-test	20, 15	neurons from 4, 4 mice (WT, KO)	WT = 30.46 ± 1.525 KO = 32.74 ± 1.662		0.3238	t=1.002 df=33	WT = 0.2973 KO = 0.5580	Yes
			Rise time (ms)	two-tailed unpaired Student’s t-test	20, 15	neurons from 4, 4 mice (WT, KO)	WT = 4.265 ± 0.02548 KO = 4.23 ± 0.02872		0.3713	t=0.9073 df=31	WT =0.8487 KO = 0.3601	Yes
			Decay time (ms)	two-tailed unpaired Mann-Whitney test	20, 15	neurons from 4, 4 mice (WT, KO)	WT = 19.4 ± 1.262 KO = 17.3 ± 0.8431		0.3358	Mann-Whitney U = 94	WT = 0.0011 KO = 0.0710	No
	F	(CA3) DCG-IV AMPAR-mEPSCs	Frequency (Hz)	two-tailed unpaired Mann-Whitney test	30, 25	neurons from 8, 8 mice (WT, KO)	WT = 0.10580 ± 0.01718 KO = 0.08308 ± 0.01394		0.5144	Mann-Whitney U = 311	WT = 0.0007 KO = 0.1609	No
			Amplitude (pA)	two-tailed unpaired Student’s t-test	30, 25	neurons from 8, 8 mice (WT, KO)	WT = 30.91 ± 1.656 KO = 29.73 ± 1.483		0.6032	t=0.523 df=53	WT = 0.2025 KO = 0.4377	Yes
			Rise time (ms)	two-tailed unpaired Student’s t-test	30, 25	neurons from 8, 8 mice (WT, KO)	WT = 0.6881 ± 0.002703 KO = 0.6941 ± 0.002854		0.1346	t=1.52 df=53	WT = 0.4182 KO = 0.2390	Yes
			Decay time (ms)	two-tailed unpaired Student’s t-test	30, 25	neurons from 8, 8 mice (WT, KO)	WT = 5.407 ± 0.1412 KO = 5.008 ± 0.1407		0.0523	t=1.985 df=53	WT = 0.1362 KO = 0.2723	Yes
	G	(CA3) LY354740 AMPAR-mEPSCs	Frequency (Hz)	two-tailed unpaired Student’s t-test	14, 13	neurons from 4, 4 mice (WT, KO)	WT = 0.1801 ± 0.03315 KO = 0.1233 ± 0.02085		0.1919	t=1.348 df=21	WT = 0.1841 KO = 0.5149	Yes
			Amplitude (pA)	two-tailed unpaired Student’s t-test	14, 13	neurons from 4, 4 mice (WT, KO)	WT = 23.25 ± 2.196 KO = 21.82 ± 2.08		0.643	t=0.4694 df=24	WT = 0.7811 KO = 0.1129	Yes
			Rise time (ms)	two-tailed unpaired Student’s t-test	14, 13	neurons from 4, 4 mice (WT, KO)	WT = 0.9629 ± 0.0191 KO =0.9315 ± 0.0193		0.1546	Mann-Whitney U = 61	WT = 0.0543 KO =0.0472	No
			Decay time (ms)	two-tailed unpaired Student’s t-test	14, 13	neurons from 4, 4 mice (WT, KO)	WT = 4.684 ± 0.2058 KO = 4.876 ± 0.4331		0.6937	t=0.3995 df=20	WT = 0.5392 KO = 0.1455	Yes
	H	(CA3) KAR-mEPSCs	Frequency (Hz)	two-tailed unpaired Mann-Whitney test	16, 15	neurons from 8, 8 mice (WT, KO)	WT = 0.07026 ± 0.0275 KO = 0.2223 ± 0.066		0.0115, *	Mann-Whitney U = 57	WT = <0.0001 KO = 0.1516	No
			Amplitude (pA)	two-tailed unpaired Student’s t-test	16, 15	neurons from 8, 8 mice (WT, KO)	WT = 7.621 ± 0.5067 KO = 9.508 ± 0.5594		0.0181, *	t=2.506 df=29	WT = 0.7092 KO = 0.1491	Yes
			Rise time (ms)	two-tailed unpaired Student’s t-test	16, 15	neurons from 8, 8 mice (WT, KO)	WT = 6.587 ± 0.5337 KO = 6.802 ± 0.3866		0.7494	t=0.3224 df=29	WT = 0.5055 KO = 0.4083	Yes
			Decay time (ms)	two-tailed unpaired Student’s t-test	16, 15	neurons from 8, 8 mice (WT, KO)	WT = 46.57 ± 4.131 KO = 71.3 ± 3.53		<0.0001, ***	t=4.523 df=29	WT = 0.5461 KO = 0.1164	Yes
	I	(CA3) NMDAR-mEPSCs	Frequency (Hz)	two-tailed unpaired Mann-Whitney test	18, 18	neurons from 4, 4 mice (WT, KO)	WT = 0.1495 ± 0.01742 KO = 0.1065 ± 0.01555		0.0455, *	Mann-Whitney U = 92.5	WT = 0.0386 KO = 0.0900	No
			Amplitude (pA)	two-tailed unpaired Mann-Whitney test	18, 18	neurons from 4, 4 mice (WT, KO)	WT = 19.67 ± 1.902 KO = 20.37 ± 2.086		0.8391	Mann-Whitney U = 155	WT = 0.0003 KO = 0.1524	No
			Rise time (ms)	two-tailed unpaired Student’s t-test	18, 18	neurons from 4, 4 mice (WT, KO)	WT = 10.42 ± 0.5477 KO = 10.72 ± 0.5657		0.7113	t=0.3733 df=34	WT = 0.9659 KO = 0.7863	Yes
			Decay time (ms)	two-tailed unpaired Student’s t-test	18, 18	neurons from 4, 4 mice (WT, KO)	WT = 130.4 ± 2.968 KO = 129.8 ± 2.969		0.8987	t=0.1283 df=34	WT = 0.8279 KO = 0.2088	Yes
4	C	MF-CA3 EPSC (Input-Output Relationship)	Amplitude (pA)	two-way ANOVA followed by Sidak's multiple comparisons test	6, 6	neurons from 6, 6 mice (WT, KO)	10 μA	WT = 37.47 KO = 26.07	>0.9999 0.9993 0.9967 0.9988 0.9915 0.9436	t(48) = 0.1865 t(48) = 0.3843 t(48) = 0.5071 t(48) = 0.4248 t(48) = 0.6051 t(48) = 0.8848	Not applicable	Not applicable
							20 μA	WT = 125.3 KO = 148.8
							30 μA	WT = 225.3 KO = 256.3
							40 μA	WT = 278.2 KO = 304.2
							50 μA	WT = 356.8 KO = 319.8
							60 μA	WT = 387.4 KO = 333.3
	D	MF-CA3 EPSC (Rise time)	Time Constant (ms)	two-tailed unpaired Student’s t-test	6, 6	neurons from 6, 6 mice (WT, KO)	WT = 1.199 ± 0.07178 KO = 1.601 ± 0.08741		0.0052, **	t=3.554 df=10	Not available (N too small)	Not available	WT = 0.5401 KO = 0.7816	Yes
	E	MF-CA3 EPSC (Decay fast component)	Time Constant (ms)	two-tailed unpaired Student’s t-test	6, 6	neurons from 6, 6 mice (WT, KO)	WT = 7.598 ± 0.5195 KO = 9.43 ± 0.7709		0.0769	t=1.972 df=10	Not available (N too small)	Not available	WT = 0.3303 KO = 0.8036	Yes
	F	MF-CA3 EPSC (Decay slow component)	Time Constant (ms)	two-tailed unpaired Student’s t-test	6, 6	neurons from 6, 6 mice (WT, KO)	WT = 114.8 ± 9.366 KO = 165.8 ± 7.951		0.002, **	t=4.151 df=10	Not available (N too small)	Not available	WT = 0.4449 KO = 0.1689	Yes
	H	MF-CA3 KAR-EPSC (Input-Output Relationship)	Amplitude (pA)	two-way ANOVA followed by Sidak's multiple comparisons test	6, 6	neurons from 6, 6 mice (WT, KO)	10 μA	WT = 5.082 KO = 7.198	>0.9999 >0.9999 0.9999 >0.9999 >0.9999 >0.9999	t(60) = 0.1164 t(60) = 0.0951 t(60) = 0.2792 t(60) = 0.1127 t(60) = 0.0566 t(60) = 0.2708	Not applicable	Not applicable
							20 μA	WT = 14.88 KO = 13.15
							30 μA	WT = 25.85 KO = 30.93
							40 μA	WT = 40.91 KO = 42.96
							50 μA	WT = 48.87 KO = 49.90
							60 μA	WT = 58.01 KO = 53.09
	J	KAR-EPSC/MF-EPSC (%)	% of Ratio	two-tailed unpaired Student’s t-test	6, 6	neurons from 6, 6 mice (WT, KO)	WT = 15.17 ± 3.891 KO = 14.83 ± 5.802		0.6991	Mann-Whitney U = 15	Not available (N too small)	Not available	WT = 0.4966 KO = 0.0202	No
	K	MF-CA3 AMPAR-EPSC (Input-Output Relationship)	Amplitude (pA)	two-way ANOVA followed by Sidak's multiple comparisons test	6, 6	neurons from 6, 6 mice (WT, KO)	10 μA	WT = 32.48 KO = 19.75	>0.9999 0.9995 0.9993 0.9997 0.9792 0.9097	t(48) = 0.1995 t(48) = 0.3604 t(48) = 0.3850 t(48) = 0.3323 t(48) = 0.7193 t(48) = 0.9837	Not applicable	Not applicable
							20 μA	WT = 113.7 KO = 136.7
							30 μA	WT = 201.2 KO = 225.8
							40 μA	WT = 239.4 KO = 260.6
							50 μA	WT = 314.9 KO = 269.1
							60 μA	WT = 341.6 KO = 278.8
	L	KAR-EPSC/AMPAR-EPSC	Ratio	two-tailed unpaired Student’s t-test	6, 6	neurons from 6, 6 mice (WT, KO)	WT = 0.1914 ± 0.0550 KO = 0.2109 ± 0.1084		0.6991	Mann-Whitney U = 15	Not available (N too small)	Not available	WT = 0.5642 KO = 0.0026	No
	N	MF-CA3 NMDAR-EPSC (Input-Output Relationship)	Amplitude (pA)	two-way ANOVA followed by Sidak's multiple comparisons test	13, 13	neurons from 6, 6 mice (WT, KO)	10 μA	WT = 21.60 KO = 23.87	>0.9999 0.9995 >0.9999 0.9934 0.9644 >0.9999	t(144) = 0.05426 t(144) = 0.3627 t(144) = 0.2088 t(144) = 0.5744 t(144) = 0.7978 t(144) = 0.2596	Not applicable	Not applicable
							20 μA	WT = 91.89 KO = 76.74
							30 μA	WT = 148.3 KO = 139.6
							40 μA	WT = 213.4 KO = 189.4
							50 μA	WT = 266.3 KO = 232.9
							60 μA	WT = 255.6 KO = 266.4
	O	MF-CA3 NMDAR-EPSC (Rise time)	Time Constant (ms)	two-tailed unpaired Student’s t-test	13, 13	neurons from 6, 6 mice (WT, KO)	WT = 5.483 ± 0.3334 KO = 5.298 ± 0.2725		0.6714	t=0.4294 df=24	WT = 0.4833 KO = 0.6605	Yes	WT = 0.1943 KO = 0.7805	Yes
	P	MF-CA3 NMDAR-EPSC (Decay time)	Time Constant (ms)	two-tailed unpaired Student’s t-test	13, 13	neurons from 6, 6 mice (WT, KO)	WT = 124.3 ± 7.17, KO = 126.6 ± 6.643		0.8152	t=0.2364 df=24	WT = 0.3327 KO = 0.3887	Yes	WT = 0.1683 KO = 0.3479	Yes
	S	AC-CA3 EPSC (Input-Output Relationship)	Amplitude (pA)	two-way ANOVA followed by Sidak's multiple comparisons test	16, 15	neurons from 14, 13 mice (WT, KO)	10 μA	WT = 22.22 KO = 43.01	0.9944 0.9012 0.9482 >0.9999 >0.9999 >0.9999	t(174) = 0.5559 t(174) = 0.9972 t(174) = 0.8628 t(174) = 0.2504 t(174) = 0.2088 t(174) = 0.2474	Not applicable	Not applicable
							20 μA	WT = 82.90 KO = 120.2
							30 μA	WT = 137.3 KO = 169.6
							40 μA	WT = 178.1 KO = 187.4
							50 μA	WT = 216.4 KO = 208.6
							60 μA	WT = 230.1 KO = 239.4
6	B	Paired-pulse ratio	fEPSP1/fEPSP2	two-way ANOVA followed by Sidak's multiple comparisons test	7, 7	neurons from 7, 7 mice (WT, KO)	20 ms	WT = 2.866 KO = 2.690	0.9675 0.9983 0.9523 >0.9999 >0.9999	t(60) = 0.6850 t(60) = 0.3592 t(60) = 0.7504 t(60) = 0.1367 t(60) = 0.0600	Not applicable	Not applicable
							50 ms	WT = 2.150 KO = 2.242
							100 ms	WT = 1.867 KO = 2.059
							1000 ms	WT = 1.385 KO = 1.420
							3000 ms	WT = 1.161 KO = 1.176
	D	Paired-pulse ratio	fEPSP1/fEPSP2	two-way ANOVA followed by Sidak's multiple comparisons test	7, 7	neurons from 7, 7 mice (WT, KO)	20 ms	WT = 1.1590 KO = 1.1060	0.9446 0.9978 0.9977 0.9998 >0.9999	t(60) = 0.7785 t(60) = 0.3778 t(60) = 0.3812 t(60) = 0.2222 t(60) = 0.0706	Not applicable	Not applicable
							50 ms	WT = 1.1420 KO = 1.1680
							100 ms	WT = 1.1510 KO = 1.1250
							1000 ms	WT = 0.9492 KO = 0.9339
							3000 ms	WT = 0.9840 KO = 0.9889
	F	Paired-pulse ratio	fEPSP1/fEPSP2	two-way ANOVA followed by Sidak's multiple comparisons test	6, 6	neurons from 6, 6 mice (WT, KO)	20 ms	WT = 1.1190 KO = 1.0570	0.9784 0.9970 0.7900 0.4652 0.9446	t(50) = 0.6240 t(50) = 0.4039 t(50) = 1.1200 t(50) = 1.5920 t(50) = 0.7796	Not applicable	Not applicable
							50 ms	WT = 0.9058 KO = 0.9460
							100 ms	WT = 0.8813 KO = 0.7699
							1000 ms	WT = 0.9049 KO = 1.0630
							3000 ms	WT = 1.1150 KO = 1.0370
	H	Paired-pulse ratio	PPF (Paired-pulse facilitation)	two-tailed unpaired Student’s t-test	8, 6	slices from 6, 5 mice (WT, KO)	WT = 1.83 ± 0.04648 KO = 1.824 ± 0.1294		0.9596	t=0.0517 df=12	WT = 0.4194 KO = Not available (N too small)	Not available	WT = 0.4468 KO = 0.1525	Yes
	J	MF-CA3 LTP	Last 10 min of LTP (% of Baseline)	two-tailed unpaired Student’s t-test	7, 7	slices from 7, 6 mice (WT, KO)	WT = 166.2 ± 13.14 KO = 169.0 ± 20.93		0.9127	t=0.112 df=12	Not available (N too small)	Not available	WT = 0.7851 KO = 0.1218	Yes
	K	MF-CA3 LTP	Peak of PTP (% of Baseline)	two-tailed unpaired Student’s t-test	7, 7	slices from 7, 6 mice (WT, KO)	WT = 628.3 ± 56.12 KO = 871.9 ± 163.5		0.1842	t=1.409 df=12	Not available (N too small)	Not available	WT = 0.2286 KO = 0.5124	Yes
	L	MF-CA3 LTP	MF inhibition by DCG-IV	two-tailed unpaired Student’s t-test	7, 7	slices from 7, 6 mice (WT, KO)	WT = 89.83 ± 2.78 KO = 87.4 ± 4.821		0.6699	t=0.437 df=12	Not available (N too small)	Not available	WT = 0.2912 KO = 0.1734	Yes
7	B	Extrasynaptic AMPA	Amplitude (pA) (Wholecell current)	two-tailed unpaired Student’s t-test	12, 12	neurons from 12, 12 mice (WT, KO)	WT = 855.8 ± 91.23 KO = 904.2 ± 73.50		0.6838	t=0.4128 df=22	WT = 0.8349 KO = 0.1485	Yes	WT = 0.8139 KO = 0.2623	Yes
	D	Extrasynaptic KA	Amplitude (pA) (Wholecell current)	two-tailed unpaired Student’s t-test	11, 12	neurons from 9, 8 mice (WT, KO)	WT = 392.3 ± 40.30 KO = 644.9 ± 61.94		0.003, **	t=3.351 df=21	WT = 0.5892 KO = 0.4364	Yes	WT = 0.3790 KO = 0.4158	Yes
	F	Extrasynaptic NMDA	Amplitude (pA) (Wholecell current)	two-tailed unpaired Student’s t-test	18, 17	neurons from 3, 3 mice (WT, KO)	WT = 1258 ± 69.51 KO = 1029 ± 69.00		0.0255, *	t=2.34 df=33	WT = 0.4392 KO = 0.5065	Yes	WT = 0.1952 KO = 0.5315	Yes
	G	GluK2	Total protein level	two-tailed unpaired Student’s t-test	4, 4	Hippocampus from 4, 4 mice (WT, KO)	WT =1 ± 0.3287 KO = 0.833 ± 0.1416		0.6572	t=0.4667 df=6	Not available (N too small)	Not available	WT = 0.1160 KO = 0.1013	Yes
		GluK5	Total protein level	two-tailed unpaired Student’s t-test	4, 4	Hippocampus from 4, 4 mice (WT, KO)	WT = 1 ± 0.2701 KO = 0.6526 ± 0.1632		0.3133	t=1.101 df=6	Not available (N too small)	Not available	WT = 0.1403 KO = 0.1332	Yes
		GluA2	Total protein level	two-tailed unpaired Mann-Whitney test	4, 4	Hippocampus from 4, 4 mice (WT, KO)	WT = 1 ± 0.3786 KO = 0.7516 ± 0.06605		0.8857	Mann-Whitney U = 7	Not available (N too small)	Not available	WT = 0.0285 KO = 0.6963	No
		GluK2	Surface protein level	two-tailed unpaired Student’s t-test	4, 4	Hippocampus from 4, 4 mice (WT, KO)	WT = 1 ± 0.1813 KO = 1.182 ± 0.223		0.55	t=0.6331 df=6	Not available (N too small)	Not available	WT = 0.0702 KO = 0.5275	Yes
		GluK5	Surface protein level	two-tailed unpaired Student’s t-test	4, 4	Hippocampus from 4, 4 mice (WT, KO)	WT = 1 ± 0.1901 KO = 0.9282 ± 0.1395		0.771	t=0.3046 df=6	Not available (N too small)	Not available	WT = 0.2665 KO = 0.7010	Yes
		GluA2	Surface protein level	two-tailed unpaired Student’s t-test	4, 4	Hippocampus from 4, 4 mice (WT, KO)	WT = 1 ± 0.1611 KO = 1.162 ± 0.2131		0.5663	t=0.6066 df=6	Not available (N too small)	Not available	WT = 0.0528 KO = 0.4357	Yes
	H	GluK2	PSD protein level (TX-100 soluble)	two-tailed unpaired Student’s t-test	6, 6	Wholebrain from 6, 6 mice (WT, KO)	WT = 1 ± 0.1954 KO = 1.222 ± 0.2101		0.4563	t=0.7749 df=10	Not available (N too small)	Not available	WT = 0.9011 KO = 0.9530	Yes
		GluA2	PSD protein level (TX-100 soluble)	two-tailed unpaired Student’s t-test	5, 5	Wholebrain from 5, 5 mice (WT, KO)	WT = 1 ± 0.3053 KO = 1.027 ± 0.3436		0.9549	t=0.05837 df=8	Not available (N too small)	Not available	WT = 0.2915 KO = 0.4451	Yes
		GluK2	non-PSD protein level (TX-100 insoluble)	two-tailed unpaired Student’s t-test	6, 6	Wholebrain from 6, 6 mice (WT, KO)	WT = 1 ± 0.121 KO = 0.9471 ± 0.1306		0.7726	t=0.2969 df=10	Not available (N too small)	Not available	WT = 0.2307 KO = 0.1953	Yes
		GluA2	non-PSD protein level (TX-100 insoluble)	two-tailed unpaired Mann-Whitney test	4, 4	Wholebrain from 4, 4 mice (WT, KO)	WT = 1 ± 0.4473 KO = 0.8725 ± 0.2925		0.8857	Mann-Whitney U = 7	Not available (N too small)	Not available	WT = 0.0336 KO = 0.3431	No
8	B	Contextual fear	24 hr Contextual Fear Memory	two-tailed unpaired Student’s t-test	19, 17	mice (WT, KO) from 2 cohorts	WT = 38.13 ± 5.069 KO = 47.33 ± 6.704		0.2759	t=1.107 df=34	WT = 0.7039 KO = 0.1582	Yes
	D	Auditory fear	24 hr Auditory Fear Memory	two-tailed unpaired Student’s t-test	10, 12	mice (WT, KO) from 2 cohorts	WT = 66.01 ± 9.654 KO = 69.94 ± 4.880		0.7063	t=0.3823 df=20	WT = 0.3138 KO = 0.7311	Yes
	E	Contextual fear renewal	Contextual Fear Renewal Memory	two-tailed unpaired Student’s t-test	10, 11	mice (WT, KO) from 2 cohorts	WT = 32.71 ± 8.073 KO = 47.80 ± 6.243		0.1515	t=1.494 df=19	WT = 0.4582 KO = 0.5793	Yes
	G	Pattern Completion-based Contextual Fear	24 hr Contextual Fear Memory	two-tailed unpaired Student’s t-test	10, 10	mice (WT, KO) from 1 cohort	WT = 33.46 ± 5.727 KO = 34.15 ± 6.239		0.9367	t=0.08057 df=18	WT = 0.8312 KO = 0.4902	Yes
	I	Novel Object Recognition test	% of Discrimination Ratio	two-tailed unpaired Student’s t-test	28, 18	mice (WT, KO) from 5 cohorts	WT = 59.51 ± 2.876 KO = 74.46 ± 2.988		0.0012, **	t=3.464 df=44	WT = 0.3677 KO = 0.9825	Yes
	J	Novel Object Recognition test	Total Sniffing Time (sec)	two-tailed unpaired Mann-Whitney test	27, 17	mice (WT, KO) from 5 cohorts	WT = 24.28 ± 2.886 KO = 23.58 ± 3.110		0.8673	Mann-Whitney U = 244	WT = <0.0001 KO = 0.0695	No
	L	(Adult) Susceptibility to Kainate-induced Seizure	Maximal Seizure Score	two-tailed unpaired Student’s t-test	18, 17	mice (WT, KO) from 2 cohorts	WT = 2.944 ± 0.3567 KO = 4.824 ± 0.4475		0.0023, **	t=3.302 df=33	WT = 0.8047 KO = 0.0797	Yes
	M	(Neonate) Susceptibility to Kainate-induced Seizure	Maximal Seizure Score	two-tailed unpaired Mann-Whitney test	20, 16	mice (WT, KO) from 3 cohorts	WT = 3.55 ± 0.276 KO = 5.25 ± 0.3096		0.0002, ***	Mann-Whitney U = 51.5	WT = 0.4512 KO = 0.0037	No
